# Supplementary material
Source: PubMed Central journal article supplement (PMC3348190)
Supplement: supp_111420_accu-stengel-2-at.pdf [file supp_111420_accu-stengel-2-at.pdf]

**Appendix 2 (as supplied by authors):** Definition of injuries

| Injury detected by the index or reference test, or region | Detailed description                                                                                                                                                                           |
|-----------------------------------------------------------|------------------------------------------------------------------------------------------------------------------------------------------------------------------------------------------------|
| 1 Skull fracture                                          | Any single or multiple fractures of the neurocranium (including the skull base), with and without displacement                                                                                 |
| 2 Brain injury                                            | Any supratentorial subarachnoid, epi- or intradural hemorrhage, single or multiple, uni- or bi-hemispherical brain tissue contusion with or without bleeding (including diffuse axonal damage) |
| 3 Extracranial vessel injury                              | Any uni- or bilateral dissection or disruption of the carotid or vertebral arteries, or injuries to major cervical veins                                                                       |
| 4 Cervical spine injury                                   | Any single or multi-level fracture of the cervical spine, disco-ligamentary rupture, or spinal cord injury                                                                                     |
| 5 Head and neck (ISS region)                              | Any single injury or combination of injuries numbered 1 to 4                                                                                                                                   |
| 6 Face (ISS region)                                       | Any single or multiple fractures of the facial (including orbital) bones, the maxilla or mandible, or soft tissue injury                                                                       |
| 7 Thoracic spine injury                                   | Any single or multi-level fracture of the cervical spine, disco-ligamentary rupture, or spinal cord injury                                                                                     |
| 8 Serial rib fractures                                    | Fractures of three or more consecutive ribs on either side, with or without dislocation                                                                                                        |
| 9 Lung contusion                                          | Single or multiple lung tissue contusions of the upper or lower lobe with or without bleeding, either side                                                                                     |
| 10 Pneumothorax                                           | Intrapleural air collection with collapse of the lung of any size and on either side                                                                                                           |
| 11 Hemothorax                                             | Any collection of blood in either hemi-thorax                                                                                                                                                  |
| 12 Aortic and cardiac injuries                            | Any contained or perforating dissection or rupture of the thoracic aorta or heart, or pericardial hematoma                                                                                     |
| 13 Chest (ISS region)                                     | Any single injury or combination of injuries numbered 7 to 12                                                                                                                                  |

**Appendix 2 (as supplied by authors):** (continued) Definition of injuries

| Injury detected by the index or reference test, or region | Detailed description                                                                                                                                                                                                   |
|-----------------------------------------------------------|------------------------------------------------------------------------------------------------------------------------------------------------------------------------------------------------------------------------|
| 14 Lumbar spine injury                                    | Any single or multi-level fracture of the lumbar spine, disco-ligamental rupture, or spinal cord injury                                                                                                                |
| 15 Liver injury                                           | Single or multiple contusions or lacerations of hepatic tissue in any lobe, with or without rupture of the liver capsule and bleeding                                                                                  |
| 16 Splenic injury                                         | Single or multiple contusions or lacerations of splenic tissue, with or without rupture of the liver capsule and bleeding                                                                                              |
| 17 Hollow visceral and mesenterial tears                  | Any single or multiple perforation or rupture of the small intestine or colorectum, or single or multiple tears of the mesenterium with or without bleeding                                                            |
| 18 Hemoperitoneum                                         | Any intra-abdominal collection of blood                                                                                                                                                                                |
| 19 Retroperitoneal bleeding                               | Any collection of blood in the retroperitoneal space                                                                                                                                                                   |
| 20 Kidney injury                                          | Any uni- or bi-lateral contusion, rupture, or other injury to the kidney, with or without active bleeding                                                                                                              |
| 21 Abdomen (ISS region)                                   | Any single injury or combination of injuries numbered 14 to 20                                                                                                                                                         |
| 22 Pelvic ring fracture                                   | Any uni- or bilateral fracture of the pubic rami or ischium bones, with and without dislocation, rupture of the symphysis, stable or unstable, uni- or bilateral fracture of the iliac bones or sacro-iliac disruption |
| 23 Acetabular fracture                                    | Any uni- or bilateral fracture of the acetabulum, with or without dislocation of fragments or the hip joint                                                                                                            |
| 24 Pelvic ring (part of ISS region Extremities)*          | Any single injury or combination of injuries numbered 22 to 23                                                                                                                                                         |

Individual injuries were defined in advance and by consensus between radiologists, trauma and orthopaedic surgeons, and the methodological supervisor.

\* This study considered only injuries usually displayed with common pan-scan protocols.
