# Supplementary material
Source: PubMed Central journal article supplement (PMC3348190)
Supplement: supp_111420_accu-stengel-3-at.pdf [file supp_111420_accu-stengel-3-at.pdf]

**Appendix 3 (as supplied by authors):** Accuracy of the initial single-pass pan-scan for individual injuries, derived from the entire cohort and the subgroup of patients with multiple trauma. Values are percentages, with 95% confidence intervals in parentheses. PPV=positive predictive value; NPV=negative predictive value

| Region or injury                    | All patients (n = 982) |                     |                     |                     |                     | Patients with multiple trauma (n = 358) |                     |                     |                     |                     |
|-------------------------------------|------------------------|---------------------|---------------------|---------------------|---------------------|-----------------------------------------|---------------------|---------------------|---------------------|---------------------|
|                                     | Prevalence             | Sensitivity         | Specificity         | PPV                 | NPV                 | Prevalence                              | Sensitivity         | Specificity         | PPV                 | NPV                 |
| Brain injuries                      | 24.0                   | 86.0<br>(80.9-90.2) | 99.2<br>(98.3-99.7) | 97.1<br>(93.9-98.9) | 95.7<br>(94.1-97.0) | 51.0                                    | 89.7<br>(84.4-93.7) | 98.9<br>(95.9-99.9) | 98.8<br>(95.8-99.9) | 90.1<br>(85.0-93.9) |
| Skull fractures                     | 15.0                   | 86.0<br>(79.0-91.4) | 99.2<br>(98.3-99.7) | 95.1<br>(89.7-98.2) | 97.6<br>(96.3-98.6) | 31.0                                    | 91.5<br>(84.5-96.0) | 98.3<br>(95.8-99.5) | 96.0<br>(90.2-98.9) | 96.3<br>(93.1-98.3) |
| Cervical spine injuries             | 10.0                   | 78.8<br>(69.4-86.4) | 99.3<br>(98.5-99.8) | 92.9<br>(85.1-97.3) | 97.7<br>(96.4-98.5) | 19.0                                    | 85.1<br>(74.3-92.6) | 99.3<br>(97.6-99.9) | 96.6<br>(88.3-99.6) | 96.7<br>(94.0-98.4) |
| Facial injuries                     | 19.0                   | 79.6<br>(73.2-85.1) | 99.1<br>(98.2-99.6) | 95.6<br>(91.1-98.2) | 95.3<br>(93.6-96.6) | 28.0                                    | 85.3<br>(76.9-91.5) | 98.1<br>(95.5-99.4) | 94.6<br>(87.8-98.2) | 94.4<br>(90.9-96.8) |
| Serial rib fractures                | 14.0                   | 89.5<br>(83.0-94.1) | 99.8<br>(99.2-100)  | 98.3<br>(94.2-99.8) | 98.4<br>(97.3-99.1) | 30.0                                    | 89.0<br>(81.6-94.2) | 100<br>(98.5-100)   | 100<br>(96.3-100)   | 95.4<br>(92.2-97.6) |
| Lung contusions                     | 20.0                   | 78.5<br>(72.0-84.0) | 98.9<br>(97.8-99.5) | 94.4<br>(89.7-97.4) | 94.9<br>(93.1-96.3) | 37.0                                    | 84.1<br>(76.7-89.9) | 97.4<br>(94.4-99.0) | 94.9<br>(89.2-98.1) | 91.4<br>(87.1-94.6) |
| Pneumothorax                        | 16.0                   | 84.4<br>(77.8-89.6) | 99.9<br>(99.3-100)  | 99.3<br>(96.0-100)  | 97.0<br>(95.7-98.1) | 34.0                                    | 81.8<br>(73.8-88.2) | 99.6<br>(97.7-100)  | 99.0<br>(94.6-100)  | 91.5<br>(87.5-94.6) |
| Hemothorax                          | 9.1                    | 57.3<br>(46.4-67.7) | 99.4<br>(98.7-99.8) | 91.1<br>(80.4-97.0) | 95.9<br>(94.4-97.1) | 22.0                                    | 57.7<br>(46.0-68.8) | 98.6<br>(96.4-99.6) | 91.8<br>(80.4-97.7) | 89.4<br>(85.4-92.6) |
| Aortic or cardiac injuries          | 2.0                    | 70.0<br>(45.7-88.1) | 99.8<br>(99.3-100)  | 87.5<br>(61.7-98.4) | 99.4<br>(98.7-99.8) | 4.7                                     | 70.6<br>(44.0-89.7) | 99.7<br>(98.4-100)  | 92.3<br>(64.0-99.8) | 98.6<br>(96.7-99.5) |
| Thoracic spine injuries             | 13.0                   | 83.3<br>(75.9-89.3) | 99.8<br>(99.2-100)  | 98.2<br>(93.7-99.8) | 97.5<br>(96.2-98.4) | 18.0                                    | 83.3<br>(72.1-91.4) | 99.3<br>(97.6-99.9) | 96.5<br>(87.9-99.6) | 96.4<br>(93.6-98.2) |
| Lumbar spine injuries               | 17.0                   | 88.4<br>(82.5-92.9) | 99.5<br>(98.8-99.9) | 97.3<br>(93.3-99.3) | 97.7<br>(96.5-98.6) | 24.0                                    | 87.1<br>(78.0-93.4) | 99.3<br>(97.4-99.9) | 97.4<br>(90.8-99.7) | 96.1<br>(93.2-98.1) |
| Liver injuries                      | 5.0                    | 85.7<br>(72.8-94.1) | 99.9<br>(99.4-100)  | 97.7<br>(87.7-99.9) | 99.3<br>(98.5-99.7) | 10.0                                    | 86.5<br>(71.2-95.5) | 99.7<br>(98.3-100)  | 97.0<br>(84.2-99.9) | 98.5<br>(96.5-99.5) |
| Splenic injuries                    | 5.8                    | 73.7<br>(60.3-84.5) | 99.7<br>(99.1-99.9) | 93.3<br>(81.7-98.6) | 98.4<br>(97.4-99.1) | 11.0                                    | 75.0<br>(58.8-87.3) | 99.1<br>(97.3-99.8) | 90.9<br>(75.7-98.1) | 96.9<br>(94.4-98.5) |
| Hollow visceral or mesenteric tears | 2.1                    | 57.1<br>(34.0-78.2) | 98.5<br>(97.6-99.2) | 46.2<br>(26.6-66.6) | 99.1<br>(98.2-99.6) | 4.7                                     | 47.1<br>(23.0-72.2) | 97.4<br>(95.1-98.8) | 47.1<br>(23.0-72.2) | 97.4<br>(95.1-98.8) |
| Retroperitoneal haematoma           | 5.9                    | 62.1<br>(48.4-74.5) | 98.9<br>(98.0-99.5) | 78.3<br>(63.6-89.1) | 97.6<br>(96.5-98.5) | 13.0                                    | 67.4<br>(52.0-80.5) | 98.1<br>(95.9-99.3) | 83.8<br>(68-93.8)   | 95.4<br>(92.5-97.4) |
| Renal trauma                        | 3.3                    | 56.3<br>(37.7-73.6) | 99.5<br>(98.8-99.8) | 78.3<br>(56.3-92.5) | 98.5<br>(97.6-99.2) | 7.5                                     | 63.0<br>(42.4-80.6) | 98.8<br>(97.0-99.7) | 81.0<br>(58.1-94.6) | 97.1<br>(94.6-98.6) |
| Pelvic ring fractures               | 12.0                   | 95.8<br>(90.5-98.6) | 99.7<br>(99.0-99.9) | 97.4<br>(92.7-99.5) | 99.4<br>(98.7-99.8) | 20.0                                    | 97.2<br>(90.3-99.7) | 99.7<br>(98.1-100)  | 98.6<br>(92.4-100)  | 99.3<br>(97.5-99.9) |
| Acetabular fractures                | 7.9                    | 78.2<br>(67.4-86.8) | 92.7<br>(90.8-94.3) | 48.0<br>(39.1-57.1) | 98.0<br>(96.8-98.8) | 13.0                                    | 85.4<br>(72.2-93.9) | 88.5<br>(84.4-91.8) | 53.2<br>(41.5-64.7) | 97.5<br>(95.0-99)   |

Appendix to: Stengel D., Ottersbach C., Matthes G., et al. Accuracy of single-pass whole-body computed tomography for detection of injuries in patients with major blunt trauma. *CMAJ* 2012. DOI:10.1503/cmaj111420.

Copyright © 2012 Canadian Medical Association or its licensors.
