# Supplementary material
Source: PubMed Central journal article supplement (PMC3348190)

**Appendix 4: Sensitivity analysis for partial verification bias (1). Association between diagnostic accuracy of the initial trauma pan-scan and the type of subsequent reference tests.**

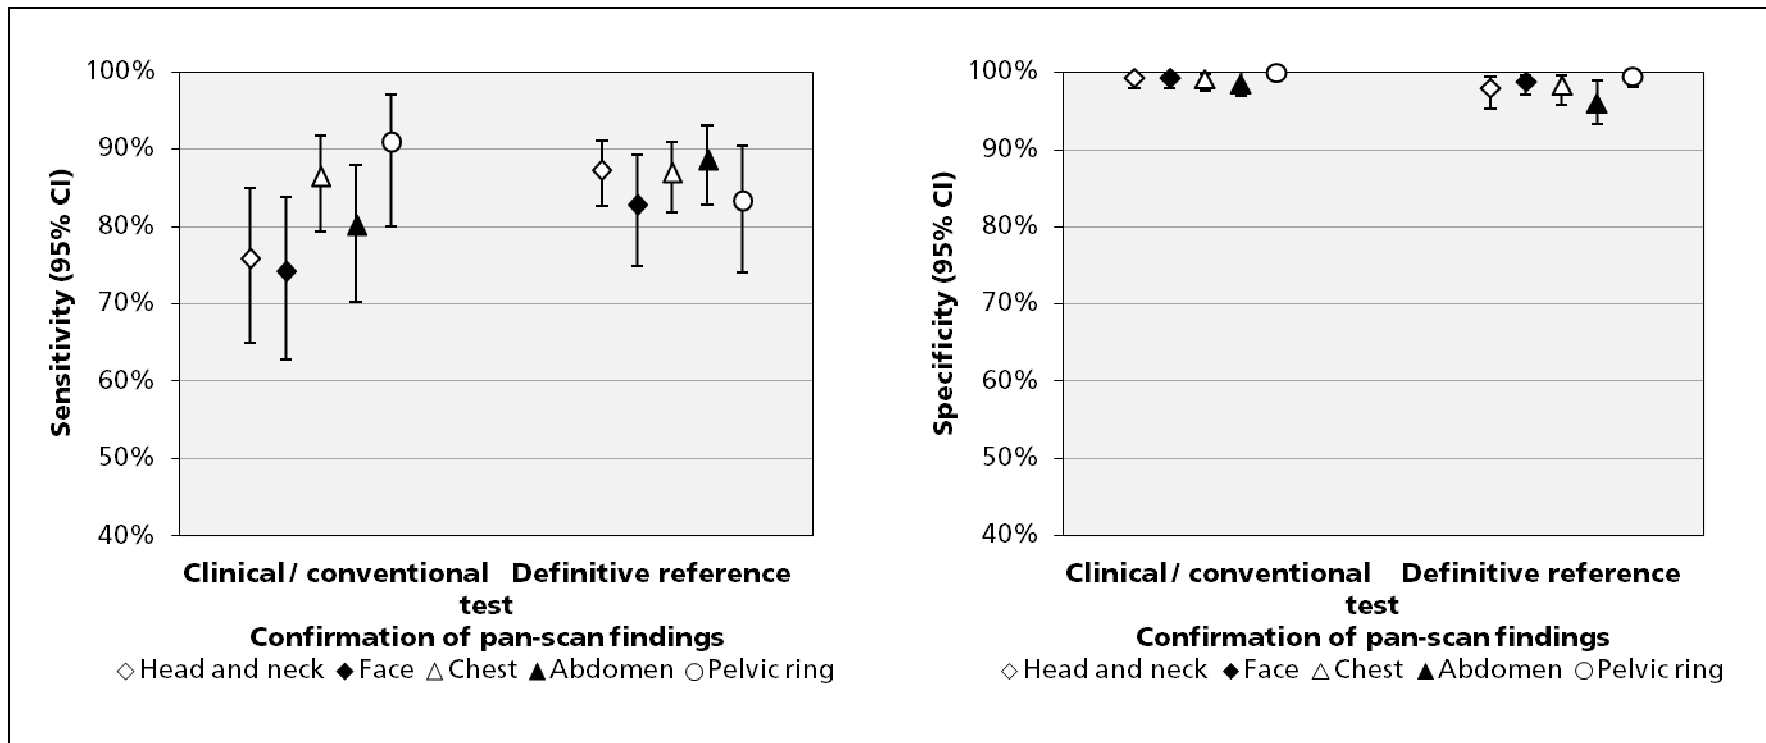

Supplement: supp_111420_accu-stengel-4-at.pdf [file supp_111420_accu-stengel-4-at.pdf]
