# Supplementary material
Source: PubMed Central journal article supplement (PMC3348190)

**Appendix 5 (as supplied by authors): Sensitivity analysis for partial verification bias (2). Association between diagnostic accuracy of the initial trauma pan-scan and duration of follow-up.**

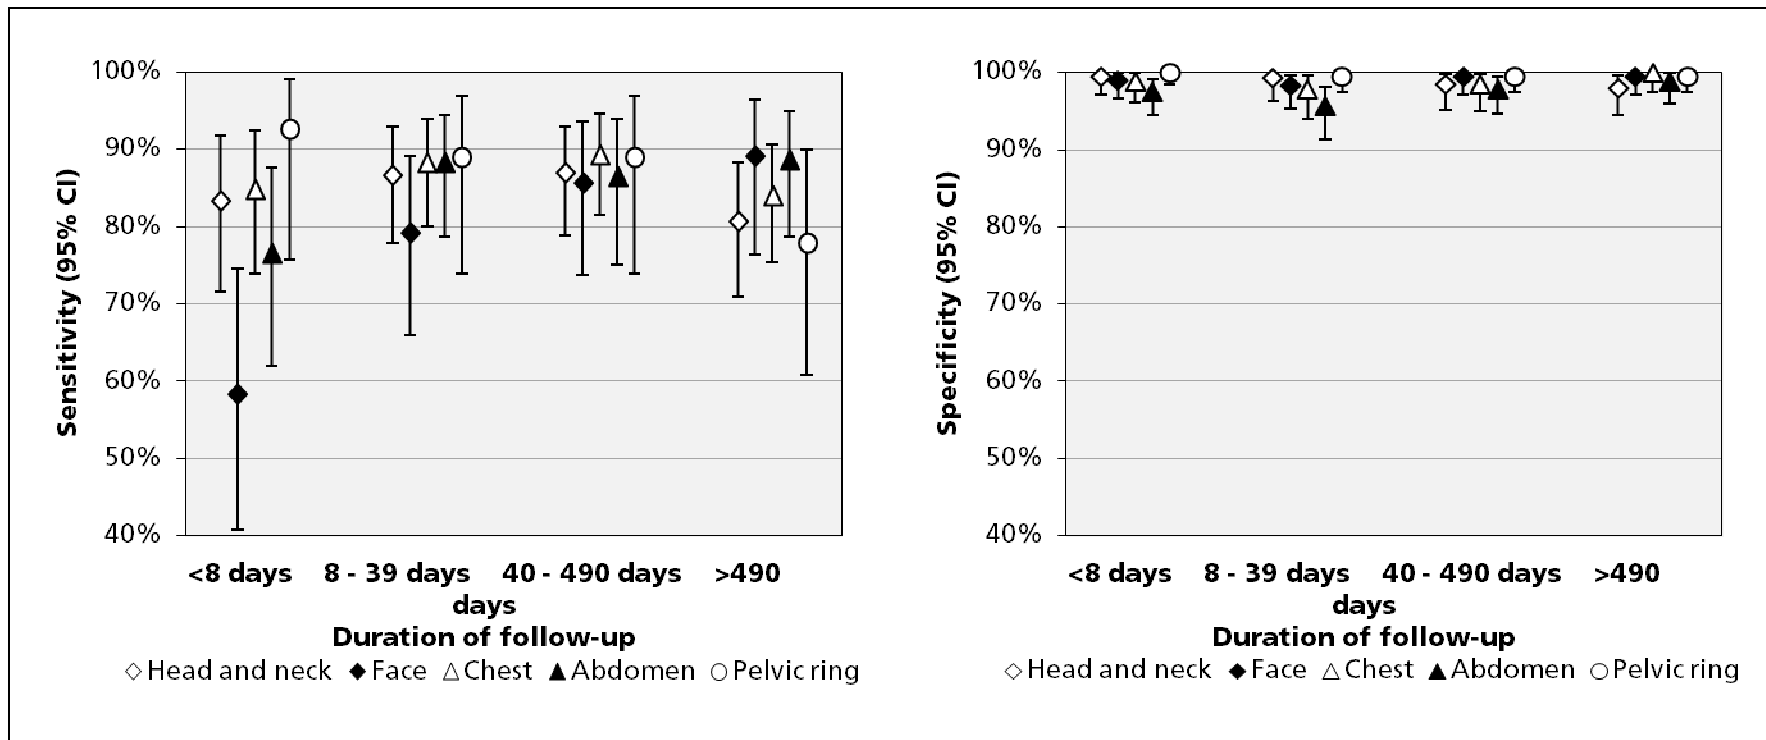

Supplement: supp_111420_accu-stengel-5-at.pdf [file supp_111420_accu-stengel-5-at.pdf]
